# Supplementary material
Source: PubMed Central journal article supplement (PMC3889530)
Supplement: 12248_2013_9544_MOESM1_ESM.pdf [file 12248_2013_9544_MOESM1_ESM.pdf]

## Supplementary Files

### **Identification of key licorice constituents which interact with cytochrome P450: Evaluation by LC/MS/MS cocktail assay and metabolic profiling**

Running head: Key licorice constituents to interact with CYP450.

Xue Qiao, Shuai Ji, Si-wang Yu, Xiong-hao Lin, Hong-wei Jin, Yao-kai Duan,  
Liang-ren Zhang, De-an Guo, and Min Ye\*

Affiliation:

State Key Laboratory of Natural and Biomimetic Drugs, School of Pharmaceutical  
Sciences, Peking University, 38 Xueyuan Road, Beijing 100191, China

\*. Corresponding author. Tel./ fax: +86 10 82802024.

*E-mail addresses:* yemin@bjmu.edu.cn (M. Ye).

## Table of Content

|    |                     |                                                                                                                               |        |
|----|---------------------|-------------------------------------------------------------------------------------------------------------------------------|--------|
| 1  | <b>Experimental</b> | LC/MS fingerprint analysis of licorice extracts.                                                                              | S3     |
| 2  | <b>Experimental</b> | LC/IT-TOF-MS analysis of licorice extracts.                                                                                   | S3     |
| 3  | <b>Figure 1S.</b>   | Chemical structures and tandem mass spectrometry of <b>C15</b> (A) and <b>C17</b> (B).                                        | S4     |
| 4  | <b>Figure 2S.</b>   | Linear correlation of GOLD score and experimental $\log_1/IC_{50}$ for CYP 2C19 inhibitors.                                   | S5     |
| 5  | <b>Figure 3S.</b>   | Docking simulation of <b>28</b> , <b>30</b> , <b>31</b> and $\alpha$ -naphthoflavone (positive control) with CYP 1A2 protein. | S6     |
| 6  | <b>Figure 4S.</b>   | Molecular docking of liquiritigenin ( <b>9</b> , A) and isoliquiritigenin ( <b>20</b> , B) with CYP 1A2.                      | S7     |
| 7  | <b>Figure 5S.</b>   | Molecular docking of 2D6 inhibitors <b>32</b> , <b>33</b> , <b>36</b> , <b>9</b> , <b>18</b> and <b>22</b> .                  | S8     |
| 8  | <b>Figure 6S.</b>   | LC/MS analysis of licorice extracts to estimate their mean molecular weights.                                                 | S9     |
| 9  | <b>Figure 7S.</b>   | Proposed <i>in vivo</i> P450 action for isoliquiritin ( <b>6</b> , A) and glycyrrhizic acid ( <b>19</b> , B).                 | S10    |
| 10 | <b>Table 1S.</b>    | Interday and intraday variation of the analytical method.                                                                     | S11    |
| 11 | <b>Table 2S.</b>    | MS parameters to analyze the metabolites of probe substrates.                                                                 | S12    |
| 12 | <b>Table 3S.</b>    | Calibration curves for probe metabolites.                                                                                     | S13    |
| 13 | <b>Table 4S.</b>    | Matrix effect and extraction efficiency of the method.                                                                        | S14    |
| 14 | <b>Table 5S.</b>    | Stability of the analytes.                                                                                                    | S15    |
| 15 | <b>Table 6S.</b>    | UV and MS spectra data of chemical constituents in <i>Glycyrrhiza uralensis</i> .                                             | S16-17 |
| 16 | <b>Table 7S.</b>    | Identification and predicted $IC_{50}$ value ranges for minor licorice compounds.                                             | S18    |

## Experimental

**LC/MS fingerprint analysis of licorice extracts.** HPLC-DAD-MS<sup>n</sup> analysis was performed on an Agilent series 1100 HPLC instrument (Agilent, Waldbronn, Germany) coupled with an LCQ Advantage ion-trap mass spectrometer (Thermo Fisher, San Jose, CA, USA) *via* an electrospray ionization (ESI) interface. The HPLC eluent was introduced into ESI source of mass spectrometer in a post-column splitting ratio of 4:1. For HPLC analysis, samples were separated on an Atlantis T3 column (5  $\mu$ m, ID 4.6 mm  $\times$  250 mm) equipped with an XTerra MS C<sub>18</sub> guard column (5  $\mu$ m, ID 3.9 mm  $\times$  20 mm) (Waters, MA, USA). The mobile phase consisted of acetonitrile (A) and water containing 0.1% (v/v) formic acid (B). A gradient program was used as follows: 0 min, 5% A; 8 min, 19% A; 15 min, 29% A; 23 min, 29% A; 23.1 min, 30% A; 25 min, 30% A; 30 min, 45% A; 45 min, 55% A; 55 min, 65% A; 70 min, 95% A; 80 min, 95% A. The flow rate was 0.7 mL/min. The column temperature was 40 °C. The sample injection volume was 10  $\mu$ L. For MS detection, high purity nitrogen and ultra-high purity helium were used as the sheath/auxiliary gas and the collision gas. The ESI source was operated in the negative ion mode. The parameters were as follows: source voltage, 4.5 kV; sheath gas (N<sub>2</sub>), 50 arbitrary units; auxiliary gas (N<sub>2</sub>), 10 units; capillary temperature, 320 °C; capillary voltage, -13 V; tube lens offset voltage, -60 V. For full scan MS analysis, spectra were recorded in the range of *m/z* 130-1200. Data were analyzed using Xcalibur<sup>TM</sup> 1.4 software (Thermo Fisher).

**LC/IT-TOF-MS analysis of licorice extracts.** To confirm the elemental composition of licorice compounds with high-accurate mass, liquid chromatography coupled with ion trap-time of flight mass spectrometry (LC/IT-TOF-MS) was employed. The system consisted of an LC-20AD pump, an SIL-20AC autosampler, a CTO-20A column oven, an ESI source, and an IT-TOF mass spectrometer (Shimadzu, Tokyo, Japan). The HPLC conditions were the same as above. MS parameters were set as follows: collision and cooling gas, high purity argon (Ar); nebulizing gas, high purity nitrogen (N<sub>2</sub>, 1.5 L/min); drying gas (N<sub>2</sub>) pressure, 100 kPa; electrospray ionization, negative mode; curved desolvation line temperature, 200°C; interface voltage, -3.5 kV; detector voltage, 1.70 kV; endcap acceleration, 3.5 V; flight tube voltage, +7.0 kV (negative mode); CID energy, 50%; CID gas, 50%. MS and MS<sup>n</sup> scan range, *m/z* 220-1200; precursor ion isolation, 3.0 Th. Instrument calibration was performed with a methanol solution of vitamin B<sub>12</sub> (C<sub>63</sub>H<sub>88</sub>CoN<sub>14</sub>O<sub>14</sub>P). The data were recorded and processed by the LC/MS solution V3.41 software, including a chemical formula predict program.

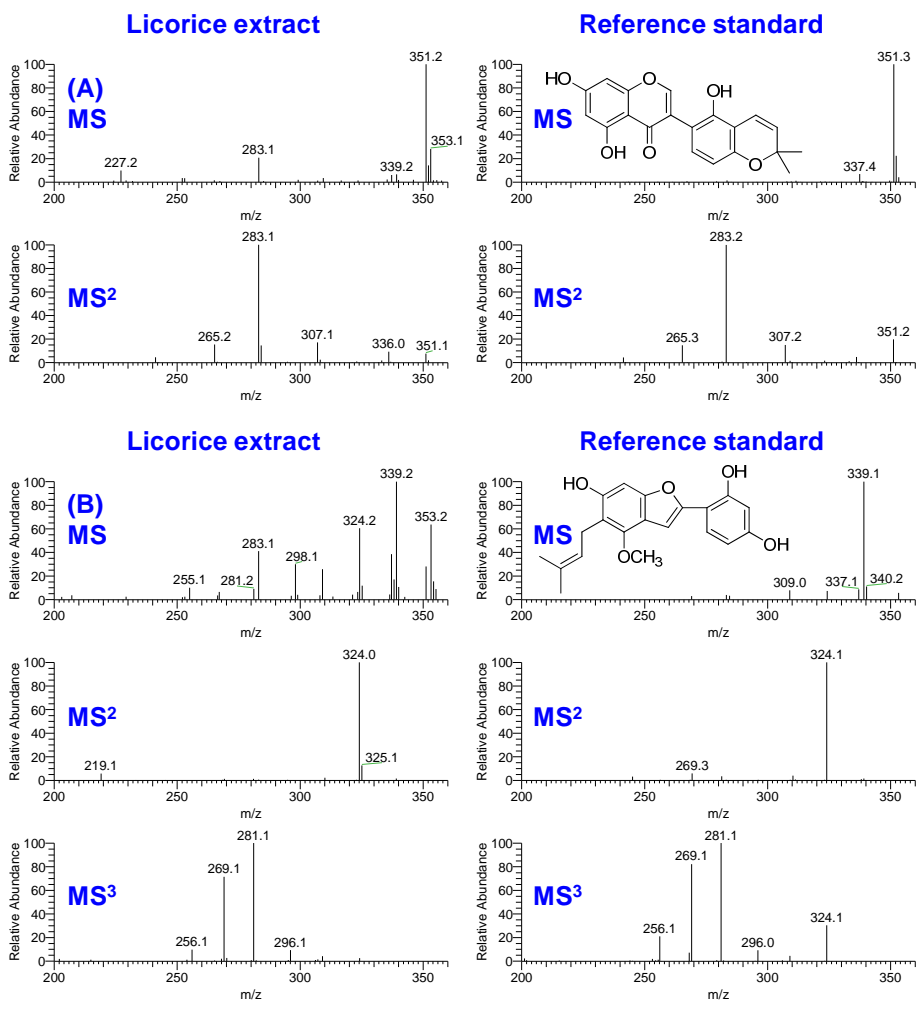

**Figure 1S.** Chemical structure and tandem mass spectrometry of **C15 (A)** and **C17 (B)**, in comparison of authentic standards.

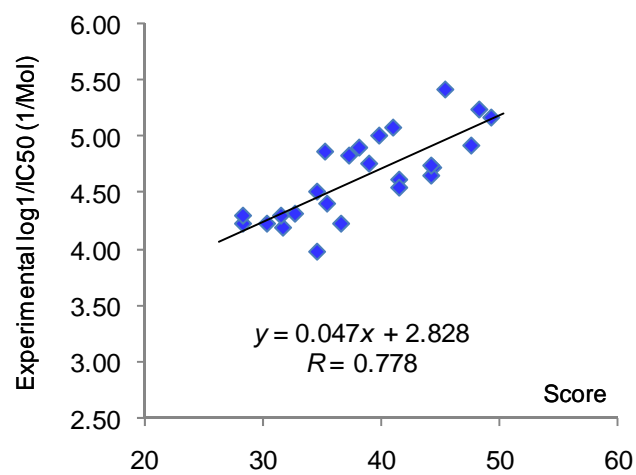

**Figure 2S.** Linear correlation of GOLD score and experimental  $\log 1/IC_{50}$  for CYP 2C19 inhibitors.

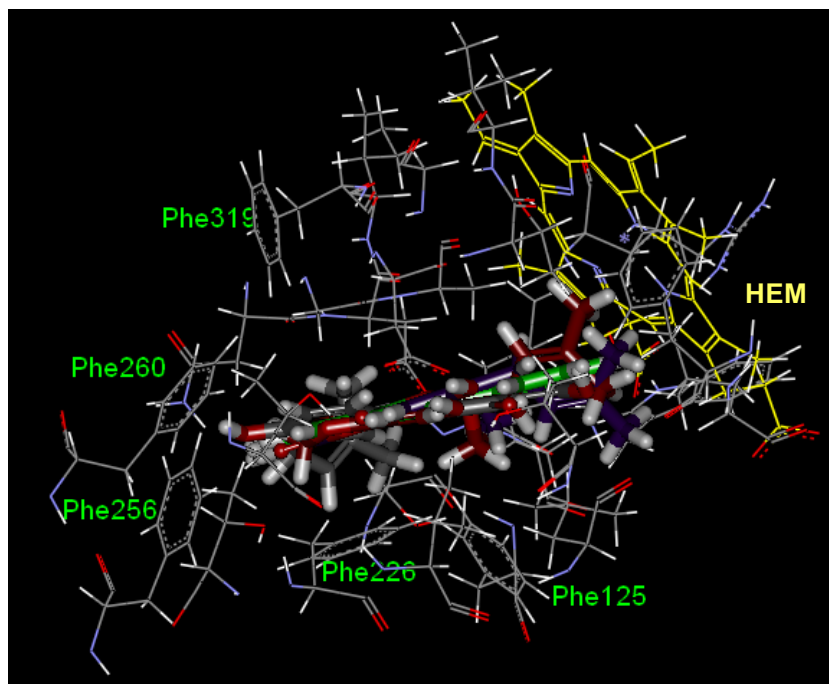

**Figure 3S.** Docking simulation of **28**, **30**, **31** and  $\alpha$ -naphthoflavone (positive control) with CYP 1A2 protein.

Licorice compounds were marked in different colors: isolicoflavonol (**28**, gray), glycyrol (**30**, red), glyurallin A (**31**, purple),  $\alpha$ -naphthoflavone (positive control, green). HEM stands for the heme group.

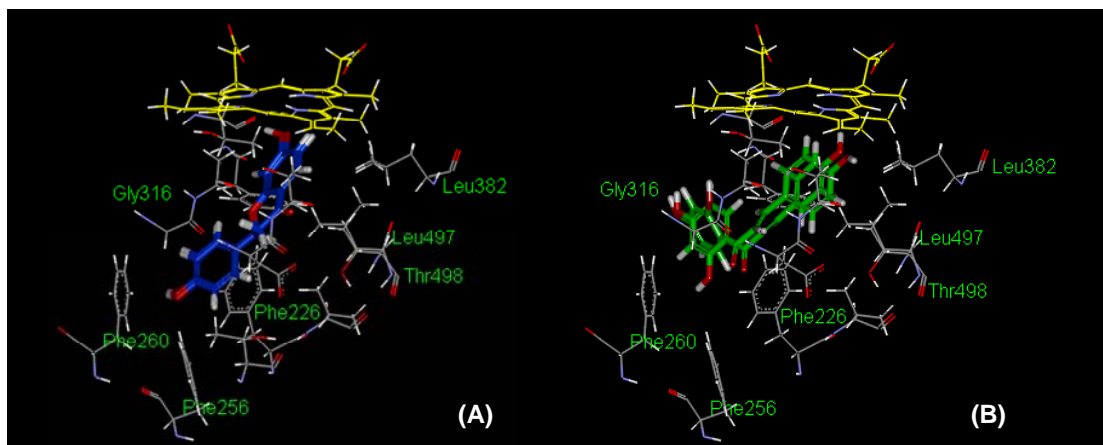

**Figure 4S.** Molecular docking of liquiritigenin (**9**, A) and isoliquiritigenin (**20**, B) with CYP 1A2.

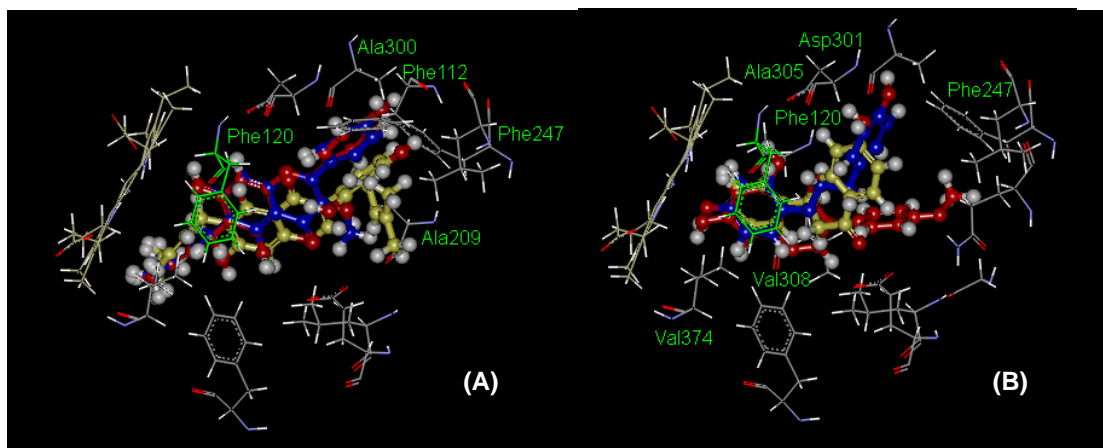

**Figure 5S.** Molecular docking of 2D6 inhibitors.

(A) prenylated flavonoids **32** (red), **33** (blue), and **36** (yellow); (B) unprenylated flavonoids **9** (yellow), **18** (blue), and **22** (red).



| Extract | Constituent in LCD                                                 | LC/UV analysis (Figure 5)                                                                                     | LC/MS analysis (average 5-70 min)                                                                          | MW used                                                                              | Extraction yeild |
|---------|--------------------------------------------------------------------|---------------------------------------------------------------------------------------------------------------|------------------------------------------------------------------------------------------------------------|--------------------------------------------------------------------------------------|------------------|
| LWE     | 170 agents reported from <i>G. uralensis</i> . Average MW was 453. | 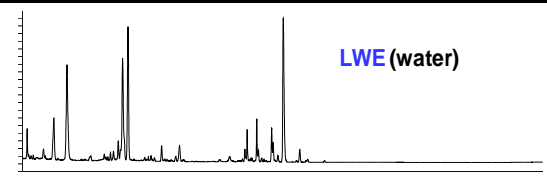 <b>LWE (water)</b>         |                         | 500                                                                                  | 36.3%            |
| LEE     |                                                                    |  <b>LEE (ethanol)</b>       |                         | 500                                                                                  | 22.8%            |
| LEA     |                                                                    |  <b>LEA (ethyl acetate)</b> |                         | 500                                                                                  | 9.0%             |
| LBU     |                                                                    | 40 saponins reported from <i>G. uralensis</i> ; Average MW was 693.                                           |  <b>LBU (n-butanol)</b> |  | 700              |

**Figure 6S.** LC/MS analysis of licorice extracts to estimate their mean molecular weights.

LCD, licorice chemical database (please refer to *Drug Metab Disp.* **2012**, *39*, 1597, and *Acta Pharmaceutica Sinica* **2012**, *47*, 1023); LWE, licorice water extract; LEE, licorice ethanol extract; LBU, licorice *n*-butanol fraction; LEA, licorice ethyl acetate fraction; The extraction yield refers to the total weight of constituents extracted from the crude drug, divided by the original weight of the drug before extraction.

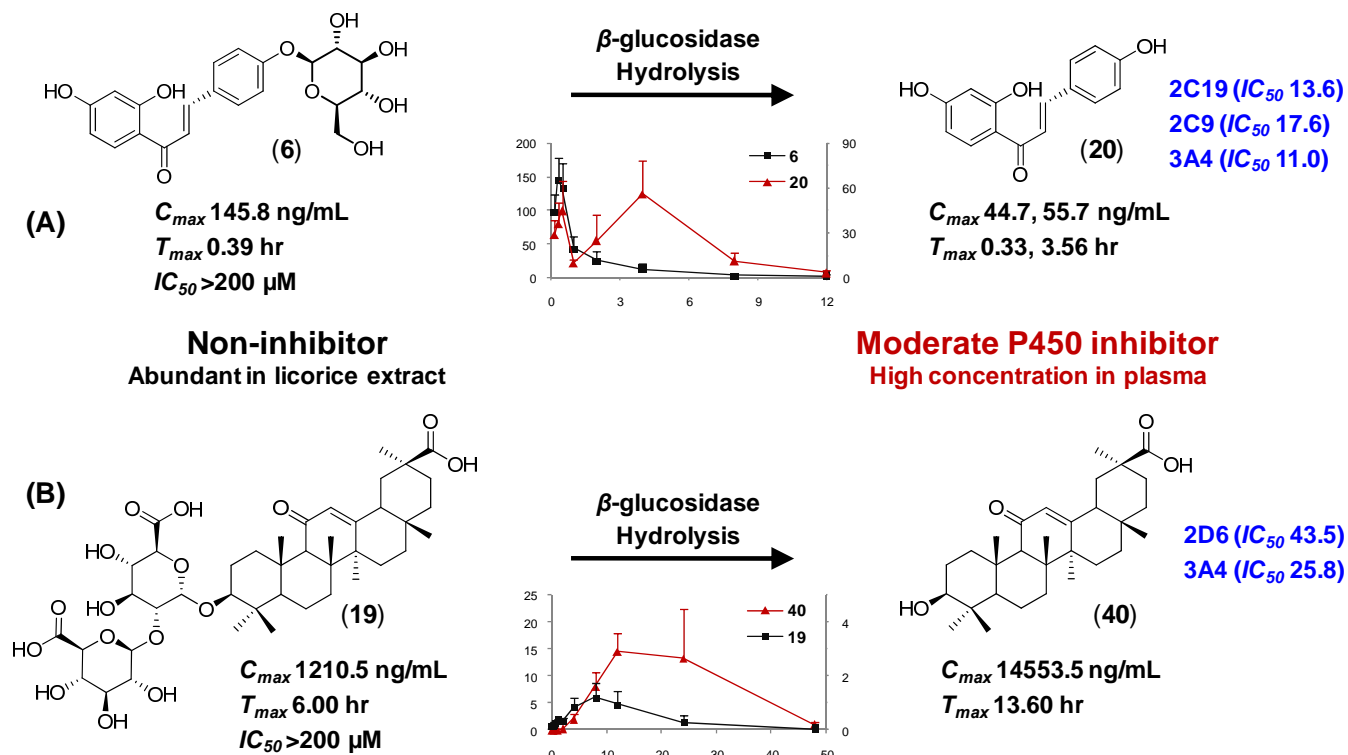

**Figure 7S.** Proposed *in vivo* P450 action for isoliquiritin (6, A) and glycyrrhizic acid (19, B).

PK parameters and curves were obtained in our previous study (20).

**Table 1S.** Interday and intraday variation of the analytical method.

|             | Analyte |       |       |        |       |       |
|-------------|---------|-------|-------|--------|-------|-------|
|             | dEtPHE  | OHOME | OHTOL | dMeDEX | OHMID | OHTES |
| LLOQ (nM)   |         |       |       |        |       |       |
| NC          | 25.0    | 1.00  | 20.0  | 1.26   | 1.00  | 50.0  |
| intraday MC | 26.5    | 0.95  | 20.4  | 1.27   | 1.06  | 53.0  |
| A           | 106     | 94    | 102   | 101    | 106   | 106   |
| RSD%        | 9.0     | 6.8   | 8.8   | 7.8    | 6.8   | 3.6   |
| interday MC | 26.8    | 0.91  | 20.6  | 1.18   | 1.08  | 54.9  |
| A           | 107     | 91    | 103   | 94     | 108   | 110   |
| RSD%        | 8.3     | 8.8   | 8.7   | 8.1    | 10.4  | 6.3   |
| MQC (nM)    |         |       |       |        |       |       |
| NC          | 125     | 5.00  | 100   | 6.32   | 5.00  | 250   |
| intraday MC | 127     | 4.90  | 101   | 6.08   | 5.13  | 258   |
| A           | 102     | 98    | 101   | 96     | 103   | 103   |
| RSD%        | 3.2     | 3.9   | 4.1   | 4.2    | 4.1   | 3.0   |
| interday MC | 136     | 5.03  | 102   | 6.23   | 5.21  | 263   |
| A           | 109     | 101   | 102   | 99     | 104   | 105   |
| RSD%        | 0.8     | 5.5   | 4.6   | 8.0    | 4.2   | 4.0   |
| HQC (nM)    |         |       |       |        |       |       |
| NC          | 500     | 20.0  | 400   | 25.3   | 20.0  | 1000  |
| intraday MC | 480     | 18.6  | 415   | 25.0   | 18.3  | 1050  |
| A           | 96      | 93    | 104   | 99     | 91    | 105   |
| RSD%        | 9.6     | 9.5   | 4.7   | 4.8    | 7.0   | 4.3   |
| interday MC | 477     | 19.1  | 423   | 26.0   | 19.4  | 1081  |
| A           | 95      | 96    | 106   | 103    | 97    | 108   |
| RSD%        | 6.7     | 6.3   | 4.0   | 6.0    | 8.1   | 9.3   |

HQC, quality control sample in high concentration; MQC, quality control sample in middle concentration; LLOQ, quality control sample near lower limit of quantitation.

NC, nominated concentration; MC, measured concentration; A, accuracy in %.

Abbreviations for analytes were consistent in following tables, and in the manuscript. dEtPHE, acetaminophen (metabolite of phenacetin by 1A2); OHOME, 5-hydroxyomeprazole (metabolite of omeprazole by 2C19); OHTOL, hydroxytolbutamide (metabolite of tolbutamide by 2C9); dMeDEX, dextrorphan (metabolite of dextromethorphan by 2D6); OHMID, 1'-hydroxymidazolam (metabolite of midazolam by 3A4/5); OHTES, 6 $\beta$ -hydroxytestosterone (metabolite of testosterone by 3A4/5).

**Table 2S.** MS parameters to analyze the metabolites of probe substrates.

| Compd  | Parent | Product_1 | CE_2 | Product_2 | CE_2 | TLO | SID | Scan time |
|--------|--------|-----------|------|-----------|------|-----|-----|-----------|
| CIM    | 253.2  | 117.1     | 27   | 159.1     | 23   | 100 | 10  | 0.1       |
| dEtPHE | 152.1  | 110.2     | 15   | 65.2      | 30   | 100 | 5   | 0.1       |
| dMeDEX | 258.2  | 157.1     | 40   | 199.1     | 30   | 100 | 5   | 0.1       |
| OHTOL  | 287.2  | 171.1     | 20   | 107.2     | 25   | 100 | 5   | 0.1       |
| OHTES  | 305.3  | 269.1     | 15   | 287.2     | 15   | 100 | 15  | 0.1       |
| OHMID  | 342.1  | 324.1     | 20   | 203.2     | 25   | 100 | 5   | 0.1       |
| OHOME  | 362.2  | 214.1     | 10   | 152.1     | 35   | 80  | 5   | 0.2       |

Parent and product refers to ion pairs in SRM transition. “1”and “2” refers to quantitative and qualitative (backup) product ions. CE, collision energy (%); TLO, tube lens offset (V); Scan time (second). CIM refers to the internal standard Cimetidine. Abbreviation of probe metabolites please refer to Note of Table 1S.

**Table 3S.** Calibration curves for probe metabolites.

| Compd  | y-Intercept | Slope    | Correlation coefficient<br>( $r^2$ ) |
|--------|-------------|----------|--------------------------------------|
| dEtPHE | 0.292       | 0.0115   | 0.991                                |
| OHOME  | -0.00154    | 0.0732   | 0.992                                |
| dMeDEX | 0.114       | 0.0746   | 0.994                                |
| OHMID  | -0.0290     | 0.114    | 0.991                                |
| OHTOL  | -0.00500    | 0.00175  | 0.990                                |
| OHTES  | -0.00773    | 0.000360 | 0.992                                |

Note: Abbreviation of probe metabolites please refer to Note of Table 1S.

**Table 4S.** Matrix effect and extraction efficiency of the method.

|            | Analyte |       |       |        |       |       |
|------------|---------|-------|-------|--------|-------|-------|
|            | dEtPHE  | OHOME | OHTOL | dMeDEX | OHMID | OHTES |
| LLOQ (nM)  |         |       |       |        |       |       |
| NC         | 25.0    | 1.00  | 20.0  | 1.26   | 1.00  | 50.0  |
| Extract MC | 24.5    | 1.01  | 21.1  | 1.28   | 0.95  | 54.4  |
| Matrix MC  | 27.5    | 1.03  | 21.4  | 1.28   | 1.13  | 56.5  |
| MeOH MC    | 28.7    | 1.17  | 20.9  | 1.33   | 1.12  | 58.4  |
| REC%       | 98      | 100   | 106   | 102    | 95    | 109   |
| EE%        | 89      | 98    | 99    | 100    | 84    | 96    |
| ME%        | 96      | 88    | 102   | 96     | 100   | 97    |
| MQC (nM)   |         |       |       |        |       |       |
| NC         | 125     | 5.00  | 100   | 6.32   | 5.00  | 250   |
| Extract MC | 118     | 4.86  | 101   | 5.96   | 5.13  | 262   |
| Matrix MC  | 140     | 5.35  | 108   | 6.05   | 5.29  | 273   |
| MeOH MC    | 148     | 5.80  | 112   | 6.37   | 5.51  | 281   |
| REC%       | 94      | 97    | 100   | 94     | 103   | 105   |
| EE%        | 84      | 91    | 94    | 98     | 97    | 96    |
| ME%        | 94      | 92    | 96    | 95     | 96    | 97    |
| HQC (nM)   |         |       |       |        |       |       |
| NC         | 500     | 20.0  | 400   | 25.3   | 20.0  | 1000  |
| Extract MC | 456     | 17.7  | 385   | 25.0   | 17.8  | 1040  |
| Matrix MC  | 497     | 19.6  | 430   | 26.6   | 21.0  | 1078  |
| MeOH MC    | 532     | 23.2  | 441   | 28.4   | 22.2  | 1146  |
| REC%       | 91      | 88    | 96    | 99.1   | 89.2  | 104   |
| EE%        | 92      | 90    | 90    | 94.3   | 84.9  | 96    |
| ME%        | 94      | 85    | 97    | 93.7   | 94.9  | 94    |

HQC, quality control sample in high concentration; MQC, quality control sample in middle concentration; LLOQ, quality control sample near lower limit of quantitation.

Extract, standards were extracted following the preparation of QC samples; Matrix, standards were added to matrix; MeOH, standards were added into methanol. NC, nominated concentration; MC, measured concentration. EE%, extraction efficiency; ME%, matrix effect; REC%, recovery. Calculation of these rates please refer to the “*Instrument method validation*” section.

Abbreviation of probe metabolites please refer to Note of Table 1S.

**Table 5S.** Stability of the analytes.

|     | dEtPHE      | OHOME       | OHTOL       | dMeDEX      | OHMID       | OHTES       |
|-----|-------------|-------------|-------------|-------------|-------------|-------------|
| L   | 0.34 ± 0.05 | 0.29 ± 0.00 | 0.12 ± 0.01 | 0.86 ± 0.11 | 2.28 ± 0.01 | 0.30 ± 0.01 |
| FT  | 0.30 ± 0.03 | 0.28 ± 0.03 | 0.12 ± 0.01 | 0.87 ± 0.07 | 2.29 ± 0.21 | 0.30 ± 0.03 |
| V % | -10.3       | -3.6        | -3.4        | 1.4         | 0.3         | -2.1        |
| LS  | 0.30 ± 0.01 | 0.28 ± 0.01 | 0.11 ± 0.01 | 0.88 ± 0.05 | 2.19 ± 0.15 | 0.29 ± 0.02 |
| V % | -10.1       | -6.1        | -9.8        | 2.8         | -3.7        | -2.8        |
| AT  | 0.30 ± 0.03 | 0.31 ± 0.01 | 0.11 ± 0.01 | 0.94 ± 0.02 | 2.55 ± 0.10 | 0.32 ± 0.02 |
| V % | -10.6       | 6.0         | -7.6        | 9.7         | 11.9        | 6.8         |
| H   | 0.98 ± 0.13 | 0.82 ± 0.04 | 0.32 ± 0.02 | 2.82 ± 0.26 | 6.44 ± 0.29 | 0.80 ± 0.09 |
| FT  | 0.94 ± 0.13 | 0.84 ± 0.02 | 0.36 ± 0.02 | 2.65 ± 0.22 | 6.52 ± 0.55 | 0.89 ± 0.05 |
| V % | -3.4        | 2.7         | 11.9        | -6.1        | 1.2         | 10.6        |
| LS  | 0.91 ± 0.02 | 0.84 ± 0.02 | 0.32 ± 0.01 | 2.56 ± 0.14 | 6.36 ± 0.22 | 0.90 ± 0.11 |
| V % | -6.7        | 2.9         | 1.4         | -9.1        | -1.2        | 11.6        |
| AT  | 0.99 ± 0.05 | 0.85 ± 0.02 | 0.35 ± 0.01 | 2.63 ± 0.02 | 6.67 ± 0.14 | 0.91 ± 0.02 |
| V % | 1.4         | 3.8         | 8.5         | -6.8        | 3.6         | 13.5        |

Note: data were presented in the form of relative peak area (analyte/internal standard) ± standard deviation; L, low concentration; H, high concentration; V, variation in %. FT, freeze-thaw; AT, ambient temperature; LS, long storage. Abbreviation of probe metabolites please refer to Note of Table 1S.

**Table 6S.** UV and MS spectra data of chemical constituents in *Glycyrrhiza uralensis*.

| No. | UV                | Tandem mass spectrometry (% of intensity)                                                                                                                                                              |
|-----|-------------------|--------------------------------------------------------------------------------------------------------------------------------------------------------------------------------------------------------|
| C1  | 226, 276 (m)      | MS <sup>2</sup> [593]: 575(7), 503(30), 473(100), 383(19), 353(33)<br>MS <sup>3</sup> [593-->473]: 383(19), 353(100)<br>MS <sup>3</sup> [593-->353]: 353(20), 325(100), 297(11)                        |
| C2  | 226, 276 (m)      | MS <sup>2</sup> [695]: 485(100), 441(6)<br>MS <sup>3</sup> [695-->485]: 441(100), 397(48)<br>MS <sup>3</sup> [695-->441]: 397(100)                                                                     |
| C3  | 224, 240          | N/A                                                                                                                                                                                                    |
| C4  | 230, 274 (m)      | MS <sup>2</sup> [433]: 313(9), 271(100)<br>MS <sup>3</sup> [433-->271]: 177(12), 169(6), 151(100)<br>MS <sup>4</sup> [433-->271-->151]: 107(100)                                                       |
| C5  | 226, 290          | MS <sup>2</sup> [433]: 271(100)<br>MS <sup>3</sup> [433-->271]: 177(31), 165(6), 151(100), 93(6)<br>MS <sup>4</sup> [433-->271-->151]: 107(100)                                                        |
| C6  | 242, 372          | MS <sup>2</sup> [549]: 429(72), 297(17), 255(100)<br>MS <sup>3</sup> [549-->255]: 153(100), 135(60), 119(10)<br>MS <sup>4</sup> [549-->255-->153]: 153(100)                                            |
| C7  | 232, 288, 314 (m) | MS <sup>2</sup> [695]: 549(100), 531(65), 255(7)<br>MS <sup>3</sup> [695-->549]: 429(16), 417(20), 297(16), 255(100)<br>MS <sup>4</sup> [695-->549-->255]: 153(100), 135(37), 119(6)                   |
| C8  | 200, 238, 370     | MS <sup>2</sup> [725]: 549(100), 531(64), 417(6), 399(9), 255(9)<br>MS <sup>3</sup> [725-->549]: 417(18), 297(15), 255(100)<br>MS <sup>4</sup> [725-->549-->255]: 153(100), 135(75)                    |
| C9  | 202, 232, 322 (m) | MS <sup>2</sup> [695]: 549(75), 531(100), 255(6)<br>MS <sup>3</sup> [695-->531]: 399(33), 297(9), 255(100), 254(7)<br>MS <sup>4</sup> [695-->531-->255]: 153(100), 135(59), 119(7)                     |
| C10 | 202, 232, 322 (m) | MS <sup>2</sup> [725]: 549(47), 531(100)<br>MS <sup>3</sup> [725-->531]: 399(17), 297(6), 255(100)<br>MS <sup>4</sup> [725-->531-->255]: 153(100), 135(95)                                             |
| C11 | 242, 286          | MS <sup>2</sup> [367]: 367(18), 352(54), 335(20), 309(38), 298(100), 297(6), 283(15)<br>MS <sup>3</sup> [367-->298]: 283(100), 267(25), 255(7)<br>MS <sup>4</sup> [367-->298-->283]: 255(100), 239(14) |
| C12 | 232, 286          | MS <sup>2</sup> [369]: 229(100), 139(8)<br>MS <sup>3</sup> [369-->229]: 229(38), 174(100)<br>MS <sup>3</sup> [369-->139]: 124(100)                                                                     |
| C13 | 204, 234, 286 (m) | MS <sup>2</sup> [807]: 807(9), 764(10), 763(22), 598(7), 351(100)<br>MS <sup>3</sup> [807-->351]: 193(100), 175(17)<br>MS <sup>4</sup> [807-->351-->193]: 71(100)                                      |
| C14 | 204, 234, 286 (m) | MS <sup>2</sup> [367]: 367(46), 352(9), 337(81), 323(8), 298(100)<br>MS <sup>3</sup> [367-->298]: 297(9), 284(7), 270(100), 269(11), 268(10), 148(16)<br>MS <sup>4</sup> [367-->298-->270]: 255(100)   |
| C15 | 232, 286          | MS <sup>2</sup> [351]: 351(9), 336(7), 307(16), 283(100), 265(13)<br>MS <sup>3</sup> [351-->283]: 283(68), 265(18), 255(22), 241(16), 239(100), 175(63)                                                |



|     |                    |                                                                                                                                                                                                                                                                                                                     |
|-----|--------------------|---------------------------------------------------------------------------------------------------------------------------------------------------------------------------------------------------------------------------------------------------------------------------------------------------------------------|
| C16 | 206, 230, 288      | MS <sup>4</sup> [351-->283-->239]: 240(39), 239(100), 209(74), 197(52)<br>MS[Full ms]651(6), 547(15), 355(42), 229(100)<br>MS <sup>2</sup> [355]: 229(100), 125(16)<br>MS <sup>3</sup> [355-->229]: 229(45), 174(100)<br>MS <sup>2</sup> [229]: 229(37), 174(100)<br>MS <sup>3</sup> [229-->174]: 146(100), 136(10) |
| C17 | 228, 322, 334 (m)  | MS <sup>2</sup> [339]: 324(100), 310(8), 165(32)<br>MS <sup>3</sup> [339-->324]: 296(9), 281(100), 269(71), 256(10)<br>MS <sup>4</sup> [339-->324-->281]: 281(78), 253(100), 237(25)                                                                                                                                |
| C18 | 228, 322, 334 (m)  | MS <sup>2</sup> [353]: 353(72), 338(100), 337(12), 321(47), 310(9), 309(6), 298(21),<br>297(26), 295(11), 284(38), 283(13), 270(6)<br>MS <sup>3</sup> [353-->338]: 338(11), 323(31), 310(10), 295(100), 294(7), 283(28),<br>270(41), 241(10)                                                                        |
| C19 | 266, 332           | MS <sup>2</sup> [337]: 337(100), 282(53)                                                                                                                                                                                                                                                                            |
| C20 | 236, 276, 312      | MS <sup>2</sup> [261]: 246(100)<br>MS <sup>3</sup> [261-->246]: 231(100)<br>MS <sup>4</sup> [261-->246-->231]: 176(100)                                                                                                                                                                                             |
| C21 | 258                | MS <sup>2</sup> [335]: 335(100), 320(21), 317(7)                                                                                                                                                                                                                                                                    |
| C22 | 202, 228, 286      | MS <sup>2</sup> [423]: 229(100), 193(46)<br>MS <sup>3</sup> [423-->229]: 229(45), 174(100)<br>MS <sup>4</sup> [423-->229-->174]: 146(100)                                                                                                                                                                           |
| C23 | 204, 216, 230, 282 | MS <sup>2</sup> [437]: 405(100), 221(10), 215(24), 203(19), 177(7)<br>MS <sup>3</sup> [437-->405]: 405(100), 390(8), 347(47), 335(9)                                                                                                                                                                                |

---

Note, m refers to multiple UV absorption wavelengths due to overlapped peaks. The analytical method was described in Supplementary Notes.

**Table 7S.** Identification and predicted  $IC_{50}$  ranges for minor licorice compounds.

|     | Identification                                                                                                    | 1A2   | 2C9    | 2C19   | 2D6    | 3A4    |
|-----|-------------------------------------------------------------------------------------------------------------------|-------|--------|--------|--------|--------|
| C1  | apigenin 6,8-di- <i>C</i> -glucopyranoside                                                                        | >200  | >200   | >200   | 50-200 | 10-50  |
| C2  | licorice glycoside D1                                                                                             | >200  | >200   | >200   | >200   | 10-50  |
| C3  | naringenin 5-glucoside                                                                                            | 10-50 | 50-200 | 50-200 | 10-50  | 10-50  |
| C4  | naringenin 7-glucoside                                                                                            | <10   | <10    | <10    | 10-50  | 10-50  |
| C5  | naringenin 4'-glucoside                                                                                           | >200  | >200   | 50-200 | 10-50  | 10-50  |
| C6  | liquiritigenin-7- <i>O</i> - $\beta$ - <i>D</i> -apiofuranosyl-4'- <i>O</i> - $\beta$ - <i>D</i> -glucopyranoside | >200  | 50-200 | >200   | 50-200 | 10-50  |
| C7  | licorice glycoside D2                                                                                             | >200  | >200   | 10-50  | >200   | 10-50  |
| C8  | licorice glycoside C2                                                                                             | >200  | >200   | >200   | >200   | 50-200 |
| C9  | licorice glycoside B                                                                                              | >200  | >200   | >200   | >200   | 10-50  |
| C10 | licorice glycoside A                                                                                              | >200  | >200   | >200   | 50-200 | 10-50  |
| C11 | isoglycycoumarin                                                                                                  | <10   | <10    | 10-50  | 10-50  | 10-50  |
| C12 | glycyrrhiza isoflavone A                                                                                          | <10   | <10    | 10-50  | 10-50  | 10-50  |
| C13 | licoricesaponin B2                                                                                                | >200  | >200   | >200   | >200   | >200   |
| C14 | glycyrrhisoflavanone                                                                                              | 10-50 | <10    | <10    | 10-50  | 10-50  |
| C15 | licoisoflavone B                                                                                                  | 10-50 | <10    | 10-50  | <10    | 10-50  |
| C16 | glyasperin C                                                                                                      | <10   | <10    | 10-50  | 10-50  | 10-50  |
| C17 | licocoumarone                                                                                                     | <10   | <10    | <10    | <10    | 10-50  |
| C18 | licobenzofuran                                                                                                    | <10   | <10    | <10    | <10    | 10-50  |
| C19 | wighteone                                                                                                         | <10   | 10-50  | <10    | 10-50  | 10-50  |
| C20 | 3-methoxy-2-(3-methylbut-2-enyl)-5-(2-pentyl)phenol                                                               | <10   | <10    | 10-50  | 10-50  | 50-200 |
| C21 | glabrone                                                                                                          | <10   | <10    | <10    | <10    | 10-50  |
| C22 | glisoflavanone                                                                                                    | >200  | <10    | 50-200 | 10-50  | 10-50  |
| C23 | kanzonol T                                                                                                        | >200  | >200   | 10-50  | 10-50  | 10-50  |
